# Supplementary material
Source: publisher site journal article supplement (https://www.dovepress.com/article/394666)
Supplement: Supplementary file 1 [file get_supplementary_file.php]

**Supporting information**

**Gold nanoparticles reduce food sensation in *Caenorhabditis elegans* via the voltage-gated channel EGL-19**

**Meimei Wang1*, Zhenzhen Zhang2*, Ning Sun3, Baolin Yang4, Jihao Mo5, Daping Wang2, Mingqin Su1, Jian Hu1, Miaomiao Wang6, Lei Wang7, 8#**

**Affiliations**

1 Department of Pathophysiology, School of Basic Medical Science, Anhui Medical University, No. 81, Mei-Shan Road, Hefei, Anhui, 230032, China.

2 Department of Biomedical Engineering, Southern University of Science and Technology, Shenzhen, 518055, China.

3 Institute of Clinical Laboratory Science, Jinling Hospital, School of Medicine, Nanjing University, Jiangsu, 210002, China.

4 Institute of Technical Biology & Agriculture Engineering, Hefei Institutes of Physical Science, Chinese Academy of Sciences, Anhui, 230032, China.

5 Department of Medical Laboratory, Luoyang Orthopedic Hospital of Henan Province, Orthopedic Institute of Henan Province, Henan, 459001, China.

6 School of Medical Science, Huang He Science and Technology University, Zhengzhou, Henan, 459001, China

7 School of Biological Sciences, Nanyang Technological University, Singapore, 639798, Singapore.

8 Department of Physiology and Biophysics, Miller School of Medicine, University of Miami, Miami, FL, 33136, USA.

Corresponding Author:

# Lei Wang, Department of Physiology and Biophysics, Miller School of Medicine, University of Miami, Miami, FL, 33136, USA. Tel: +1 786-620-1400, Email: [lxw561@miami.edu](mailto:lxw561@miami.edu).

*These authors contributed equally to this work.


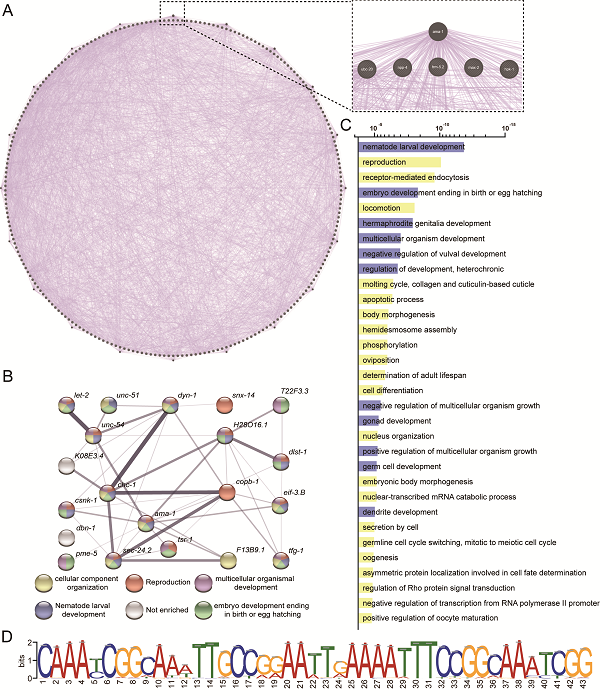


**Supplementary Figure 1.** (A) Protein-protein interaction map of the genes upregulated in AuNPs-exposed *C. elegans* group. (B) Protein-protein interactions between the top 20 upregulated genes. The biological process of each gene was marked according to gene functions. (C) Bar graph of the biological process analysis of genes upregulated in the AuNP-exposed *C. elegans* group based on *p* value. Biological processes associated with development were marked in blue, others were marked in yellow. (D) DNA motif sequence enriched in the promoter region of the upregulated genes in *C. elegans* after AuNPs exposure.


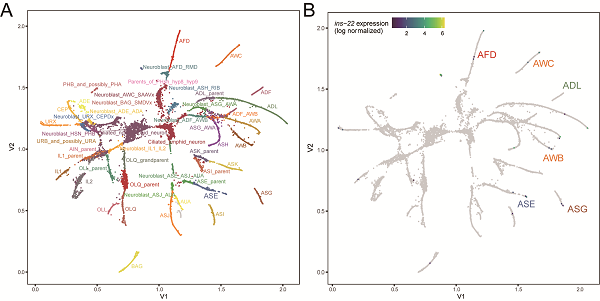


**Supplementary Figure 2.** UMAP projection showed *ins-22* expression was detected in sensory neurons. (A) UMAP projections of all ciliated neurons. (B) Expression of *ins-22* in all ciliated neurons.


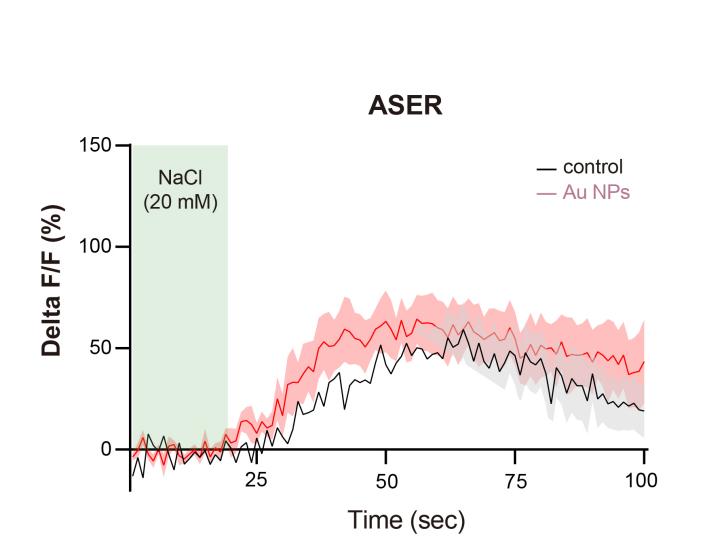


**Supplementary Figure 3.** The calcium transit dynamics of florescence signal of ASER neuron of 0 and 100 μg/mL AuNP-pre-exposed worms from 20 mM NaCl change to 0 mM.


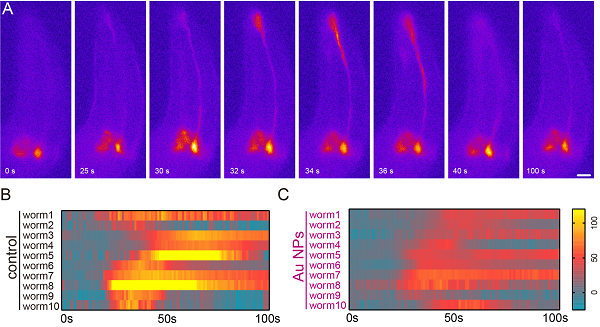


**Supplementary Figure 4.** Heatmap of individual ASEL neurons of worms from (A) control and (B) AuNPs-exposure group in response to NaCl. (C) Time slot of ASEL GCaMPs worms expose to 20 mM NaCl.


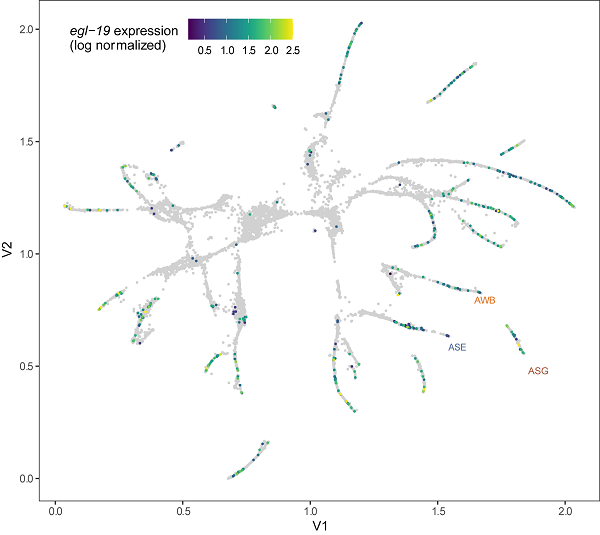


**Supplementary Figure 5.** UMAP projection showed that the expression of *egl-19* was detected in all ciliated neurons.

| **Supplementary Table 1**.Strains used in this study. | | |
| --- | --- | --- |
| **Strains** | **Source** | **Identifier** |
| N2 | Caenorhabditis Genetics Center | wild type: N2 |
| *eat-2(ad1116)* | Caenorhabditis Genetics Center | DA1116 |
| *tax-2(p691)* | Caenorhabditis Genetics Center | PR691 |
| *odr-3(n2150)* | Caenorhabditis Genetics Center | CX2205 |
| *otIs670 V; otIs672* | Caenorhabditis Genetics Center | OH16230 |
| *otIs3 V* | Caenorhabditis Genetics Center | OH3191 |
| *ntIs1 V* | Caenorhabditis Genetics Center | OH3192 |
| *Ex[flp-6p::GCaMP6s]* | This study | WMM0102 |
| *ftn-1(ok3625)* | Caenorhabditis Genetics Center | RB2603 |
| *ins-22(ok3616)* | Caenorhabditis Genetics Center | RB2594 |
| *ins-35(ok3297)* | Caenorhabditis Genetics Center | RB2412 |
| *C06C6.5(ok671)* | Caenorhabditis Genetics Center | RB844 |
| *egl-19(n582)* | Caenorhabditis Genetics Center | MT1212 |
| *egl-19(n582);Ex[flp-6p::GCaMP6s]* | This study | WMM0103 |
| zIs356 | Caenorhabditis Genetics Center | TJ356 |
|  |  |  |

**Supplementary Appendix:**

**S medium:**

1L H2O, 5.85g NaCl, 1g K2HPO4, 6g KH2PO4, 10ml 1M potassium citrate pH6, 0.0186g disodium EDTA, 0.0069g FeSO4 •7H2O, 0.002g MnCl2•4H2O, 0.0029g ZnSO4 •7H2O, 0.00025g CuSO4 •5H2O, 3ml 1M CaCl2, 3ml 1M MgSO4

**K-Medium:**

1.23 g NaCl, 0.968 g KCl, H2O to 400 ml
